# Supplementary material for: Quantifying single nucleotide variant detection sensitivity in exome sequencing
Source: PubMed Central journal article supplement (PMC3695811; doi:10.1186/1471-2105-14-195), 2013-06-18
Supplement: 1471-2105-14-195-S1.pdf [file 1471-2105-14-195-S1.pdf]

## Software commands and parameters

### Extraction of FASTQ

From Sequence Read Archive (SRA) format files (HapMap and Kabuki exomes). Fastq-dump is available from <http://trace.ncbi.nlm.nih.gov/Traces/sra/sra.cgi?view=software>.

```
fastq-dump -A SRRxxxxxx SRRxxxxxx
```

### Alignment of single-end runs with BWA

```
bwa aln -q 30 hg19.fasta sample_run.fastq > sample_run.sai
bwa samse hg19.fasta sample_run.sai sample_run.fastq
  | gzip > sample_run.bwa.sam.gz
```

### Alignment of paired-end runs with BWA

```
bwa aln -q 30 hg19.fasta sample_run_1.fastq > sample_run_1.sai
bwa aln -q 30 hg19.fasta sample_run_2.fastq > sample_run_2.sai
bwa sampe hg19.fasta sample_run_1.sai sample_run_2.sai
  sample_run_1.fastq sample_run_2.fastq | gzip > sample_run.bwa.sam.gz
```

### Further alignment with Stampy, keeping well-aligned reads from BWA

Stampy is available from <http://www.well.ox.ac.uk/project-stampy>.

```
samtools view -hbS -o sample_run.bwa.bam sample_run.bwa.sam.gz
python stampy.py --keepreforder -g hg19 -h hg19
  --bamkeepgoodreads -M sample_run.bwa.bam | gzip -c > sample_run.sam.gz
samtools view -hbS -o sample_run.unsorted.bam sample_run.sam.gz
samtools sort sample_run.unsorted.bam sample_run
```

### Merge multiple runs

for each run:

```
samtools view -H sample_run_X.bam | grep ^\@RG > sample_run_X.header.rg
samtools view -H sample_run_X.bam | grep -v ^\@RG > sample.header
cat sample.header sample_run_1.header.rg ... sample_run_N.header.rg > sample.header.txt
samtools merge -h sample.header.txt sample.pre.rmdup.bam sample_run_1.bam ...
  sample_run_N.bam
```

### Refine BAM file

Remove duplicates, re-align around indels, re-calibrate quality scores

```
java -Xmx4g -jar MarkDuplicates.jar
  INPUT=sample.pre.rmdup.bam
  OUTPUT=sample.bam
  METRICS_FILE=sample.rmdup.metrics.txt
  ASSUME_SORTED=TRUE
  VALIDATION_STRINGENCY=SILENT
```

```
java -Xmx16g -jar GenomeAnalysisTK.jar
  -T RealignerTargetCreator
```

```
-R hg19.fasta
-known 1000G_phase1.indels.hg19.vcf
-known Mills_and_1000G_gold_standard.indels.hg19.vcf
-o sample.intervals
-I sample.bam
```

```
java -Xmx16g -jar GenomeAnalysisTK.jar
-T IndelRealigner
-R hg19.fasta
-known 1000G_phase1.indels.hg19.vcf
-known Mills_and_1000G_gold_standard.indels.hg19.vcf
-targetIntervals sample.intervals
-I sample.bam
-o sample.realigned.bam
```

```
java -Xmx16g -jar GenomeAnalysisTK.jar
-T BaseRecalibrator
-R hg19.fasta
-knownSites dbsnp_137.hg19.vcf
-I sample.realigned.bam
-o sample.recal.grp
```

```
java -Xmx16g -jar GenomeAnalysisTK.jar
-T PrintReads
-R hg19.fasta
-BQSR sample.recal.grp
-I sample.realigned.bam
-o sample.recal.bam
```

## Down-sampling BAM files

Duplicates are re-marked to handle cases where reads are no longer duplicates after down-sampling.

for p from 0.1 to 0.9:

```
java -Xmx4g -jar DownsampleSam.jar
INPUT=sample.recal.bam
OUTPUT=sample.\$p.pre.rmdup.bam
PROBABILITY=\$p
R=null
```

```
java -Xmx4g -jar MarkDuplicates.jar
INPUT=sample.\$p.pre.rmdup.bam
OUTPUT=sample.\$p.bam
METRICS_FILE=sample.\$p.rmdup.metrics.txt
ASSUME_SORTED=TRUE
VALIDATION_STRINGENCY=SILENT
```

## Coverage and statistics

CCDS genes were downloaded from [ftp://ftp.ncbi.nlm.nih.gov/pub/CCDS/current\\_human/CCDS.20121025.txt](ftp://ftp.ncbi.nlm.nih.gov/pub/CCDS/current_human/CCDS.20121025.txt) on 21 March 2013. Including only rows with status “Public”, genes were split into protein-coding exonic regions and formatted into BED track format (<http://genome.ucsc.edu/FAQ/FAQformat.html#format1>).

Overlapping or abutting regions were merged to avoid double-counting. The merged regions were split into adjacent tiles of 100bp each.

```
java -Xmx4g -jar GenomeAnalysisTK.jar
-T DepthOfCoverage
-R hg19.fasta
-I sample.bam
-L CCDS.20121025.exons.tiled.bed
-omitLocusTable
-omitIntervals
-o sample.depths.tsv
```

```
java -Xmx4g -jar GenomeAnalysisTK.jar
-T CountBases
-R hg19.fasta
-I sample.bam
```

```
java -Xmx4g -jar GenomeAnalysisTK.jar
-T CountReads
-R hg19.fasta
-L CCDS.20121025.exons.merged.bed
-I sample.bam
```

### Variant calling

```
java -Xmx4g -jar GenomeAnalysisTK.jar
-T UnifiedGenotyper
-R hg19.fasta
-L CCDS.20121025.exons.merged.bed
--dbsnp dbsnp_137.hg19.vcf
-I sample.bam
-o sample.vcf
-stand_call_conf 30
-stand_emit_conf 10
-rf BadCigar
-glm BOTH
```

map VCF to GRCh37 for snpEff annotation

```
java -jar snpEff.jar
-c snpEff.config
-o vcf
-s sample.snpeff.html
-no-intergenic
-ud 1000
GRCh37.68
sample.grch37.vcf > sample.grch37.snpeff.vcf
```

## Detection sensitivity calculation example

From Methods:

Sensitivity for a given genotype  $g$  (heterozygous or homozygous) and read depth  $d$  was calculated as:

$$\frac{TP}{TP + PTP + FN}$$

where TP and PTP were the number of correctly positioned SNV calls of genotype  $g$  at read depth  $\leq d$  with correct or incorrect genotype respectively and FN was the number of SNV calls of genotype  $g$  made in the full alignment where there was no corresponding call made in any reduced alignments with read depth  $\leq d$  at that position.

In this example, we consider a set of three sites which are heterozygous in an individual, and that all three are correctly identified in the full alignment of the exome captured for that individual. The reduced alignments produce the following data, where a genotype of 0/1 is heterozygous reference, 0/0 is homozygous reference, and 1/1 is homozygous non-reference:

| Alignment size (G) | Site 1 |          | Site 2 |          | Site 3 |          |
|--------------------|--------|----------|--------|----------|--------|----------|
|                    | Depth  | Genotype | Depth  | Genotype | Depth  | Genotype |
| 0.05               | 0      | 0/0      | 1      | 0/0      | 0      | 0/0      |
| 0.10               | 1      | 0/0      | 2      | 1/1      | 0      | 0/0      |
| 0.15               | 0      | 0/0      | 3      | 1/1      | 0      | 0/0      |
| 0.20               | 2      | 1/1      | 2      | 1/1      | 0      | 0/0      |
| 0.25               | 1      | 0/0      | 3      | 1/1      | 0      | 0/0      |
| 0.50               | 3      | 1/1      | 5      | 0/1      | 0      | 0/0      |
| 0.75               | 3      | 0/1      | 8      | 0/1      | 2      | 0/0      |
| 1.00               | 4      | 0/1      | 12     | 0/1      | 3      | 0/1      |

We sort each site's genotype calls by depth, and classify them as TP, PTP, or FN. If there are different genotype calls at the same depth, they are weighted by the number of occurrences. For example, at depth 3, site 1 is called once as homozygous and once as heterozygous. Therefore it contributes 0.5 to the PTP and 0.5 to the TP count at that depth. If there is no data for a given depth, the genotype calls from that depth minus one are used, recursively.

| Depth | Site 1           | Genotypes |         |     | Classifications |    |      | Sensitivity |
|-------|------------------|-----------|---------|-----|-----------------|----|------|-------------|
|       |                  | Site 2    | Site 3  | TP  | PTP             | FN |      |             |
| 0     | 0/0 (2)          |           | 0/0 (6) | 0   | 0               | 2  | 0    |             |
| 1     | 0/0 (2)          | 0/0 (1)   |         | 0   | 0               | 3  | 0    |             |
| 2     | 1/1 (1)          | 1/1 (2)   | 0/0 (1) | 0   | 2               | 1  | 0    |             |
| 3     | 0/1 (1), 1/1 (1) | 1/1 (2)   | 0/1 (1) | 1.5 | 1.5             | 0  | 0.5  |             |
| 4     | 0/1 (1)          |           |         | 2   | 1               | 0  | 0.67 |             |
| 5     |                  | 0/1 (1)   |         | 3   | 0               | 0  | 1    |             |
| 6     |                  |           |         | 3   | 0               | 0  | 1    |             |
| 7     |                  |           |         | 3   | 0               | 0  | 1    |             |
| 8     |                  | 0/1 (1)   |         | 3   | 0               | 0  | 1    |             |
| 9     |                  |           |         | 3   | 0               | 0  | 1    |             |
| 10    |                  |           |         | 3   | 0               | 0  | 1    |             |
| 11    |                  |           |         | 3   | 0               | 0  | 1    |             |
| 12    |                  | 0/1 (1)   |         | 3   | 0               | 0  | 1    |             |

## Applying the sensitivity calibration curve

We provide the data for the sensitivity calibration curve in the file `recall.tsv`. This can be used to calculate and plot sensitivity across a given genomic region or set of regions, as in Figure 3. It can also be used to summarize the total detection sensitivity for a genomic region or set of regions, as we demonstrated for the targeted exome in Figure 2 and Supplementary Figure 3. This is done using the Genome Analysis Toolkit (McKenna *et al.*, 2010) and a custom R script.

### Calculate and plot sensitivity across a genomic region

The coordinates of a genomic region in 1-based, end-inclusive format are in a tab-delimited text file called `regions.bed`. In this example, the coordinates are for the exons of `FERMT3`, the gene shown in Figure 3.

```
chr11 63974837 63974996
chr11 63978083 63978316
chr11 63978524 63978643
chr11 63978747 63978915
chr11 63979117 63979219
chr11 63986723 63986830
chr11 63986996 63987130
chr11 63987212 63987261
chr11 63987351 63987487
chr11 63987692 63987798
chr11 63987908 63988141
chr11 63988488 63988612
chr11 63990520 63990661
chr11 63990785 63990964
```

Coverage across the region for a given exome alignment is calculated using the GATK `DepthOfCoverage` tool. The tool will generate a tab-delimited text file containing the read depth at every position in the given region.

```
java -jar GenomeAnalysisTK.jar
  -T DepthOfCoverage
  -R hg19.fasta
  -I exome.bam
  -L regions.bed
  -omitSampleSummary
  -omitIntervals
  -o depths.tsv
```

In R, this can be plotted in combination with the sensitivity calibration information from the file `recall.tsv`.

```
source("depth_and_recall.r")
library(lattice)
depths = read.target.depths.and.recall("depths.tsv", "recall.tsv")
breaks = calculate.breaks(depths)
plot.recall.over.target(depths, breaks)
```

## Summarize total detection sensitivity

For a summary statistic describing the quality of an entire exome capture or a particular subset of targets, we provide the total detection sensitivity for heterozygous and homozygous SNVs. This uses the `depths.sample_cumulative_coverage_counts` output from `DepthOfCoverage`.

```
source("depth_and_recall.r")
targets = read.table("targets.bed", col.names=c("chr", "start", "end"))
target.length = sum(targets$end - targets$start)
recall = summarize.recall("depths.tsv.sample_cumulative_coverage_counts",
                          "recall.tsv", target.length)
```

The data frame `recall` looks like this:

|   | genotype     | recall_low | recall_mean | recall_high |
|---|--------------|------------|-------------|-------------|
| 1 | Heterozygous | 0.7532072  | 0.7700903   | 0.7869733   |
| 2 | Homozygous   | 0.8595090  | 0.8713913   | 0.8831860   |

To calculate the expected number of missed SNVs at a given mean on target read depth, as given in the abstract, we identified the downsampled alignment with mean depth closest to the target for each exome, in this case 20X. We then summarized the total detection sensitivity for each of the samples as above, and took the mean  $\pm$  one standard deviation of estimated mean recall across the samples.

Supplementary Figure 1: SNV sensitivity as a function of depth at position

(a) Known (HapMap3) and novel SNVs. Novel SNV calls have no cross-reference to filter out false positives.

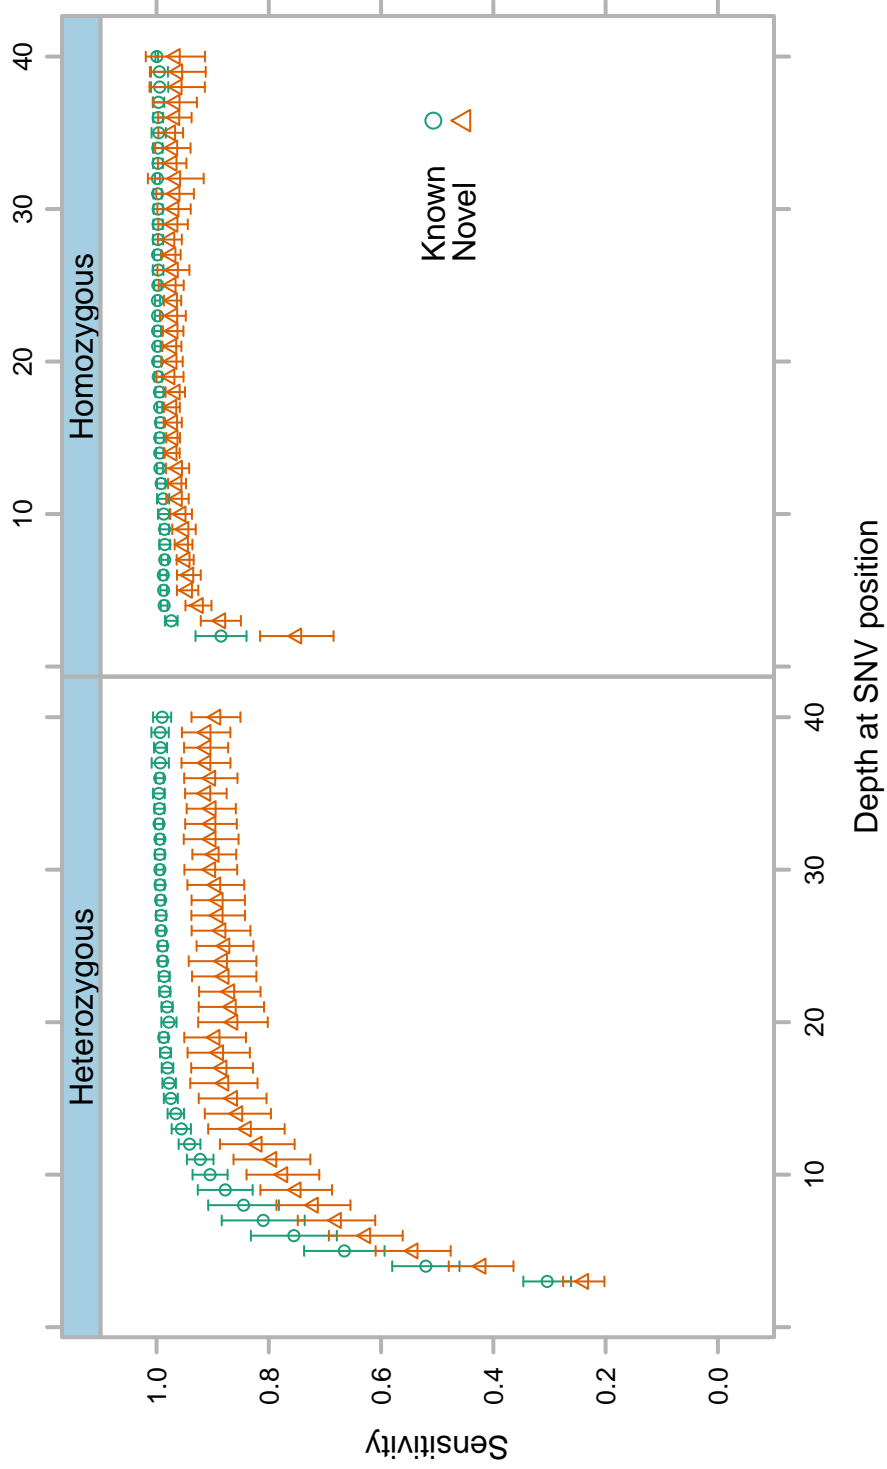

(b) Known SNVs in all tiles and difficult tiles.

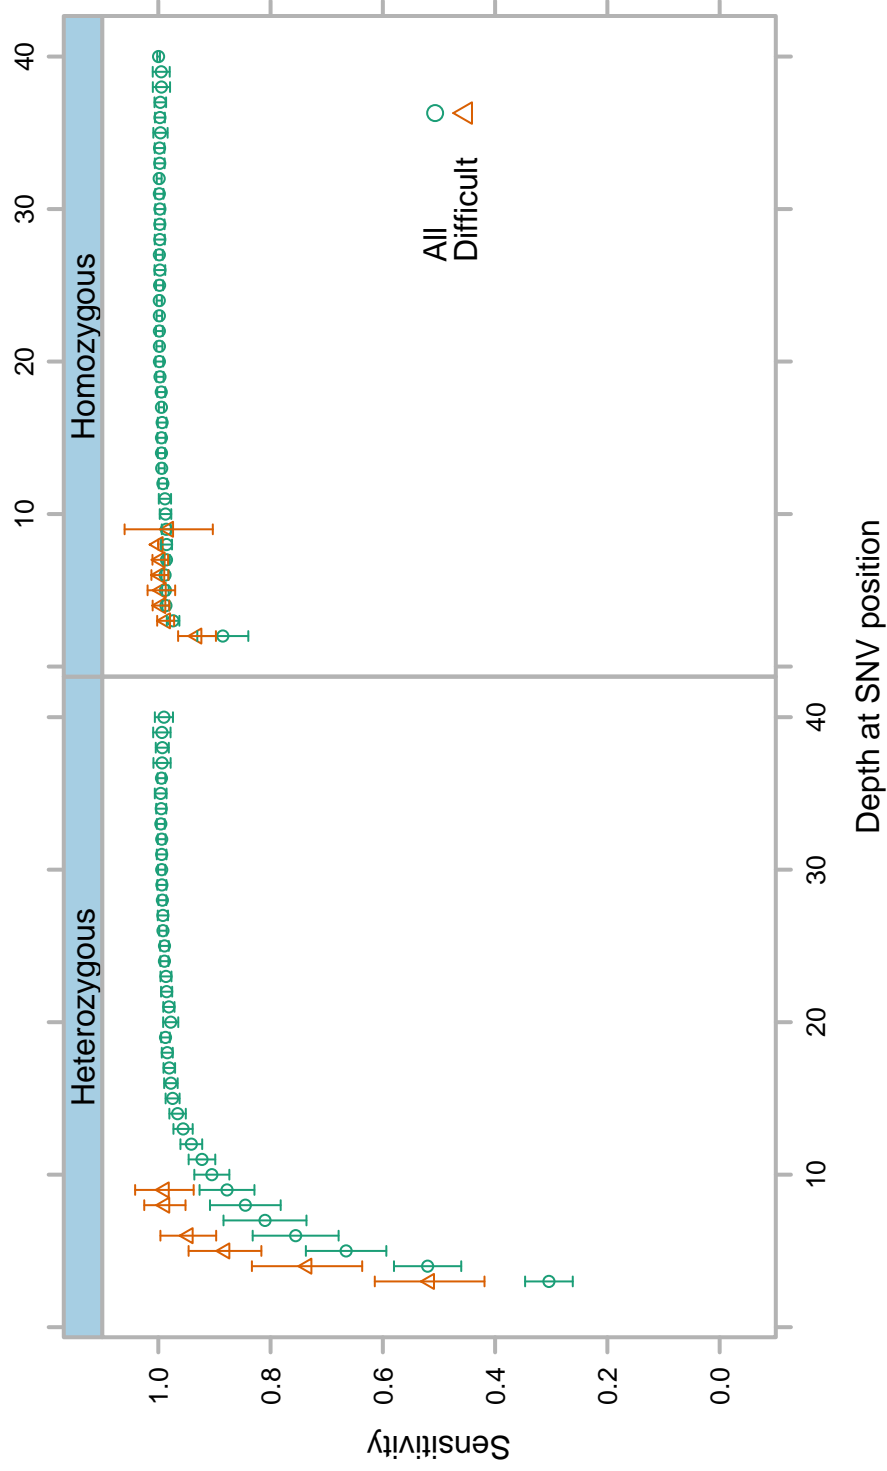



(c) Known SNVs by capture method.

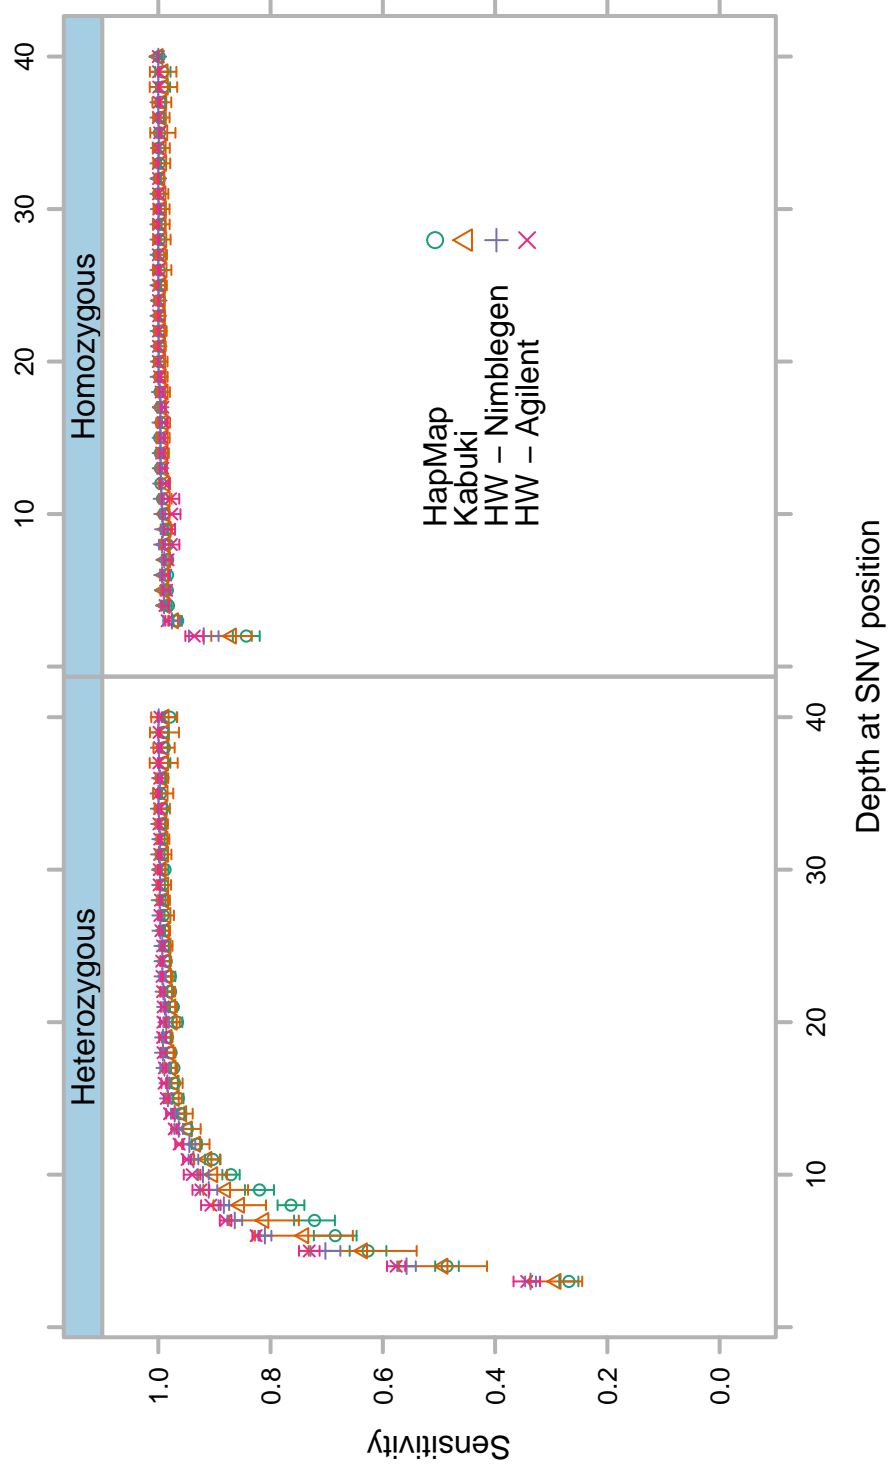

Supplementary Figure 2: Empirical heterozygous SNV sensitivity compared to theoretical heterozygous SNV sensitivity based on the binomial distribution as described in Chang *et al.* (2011).

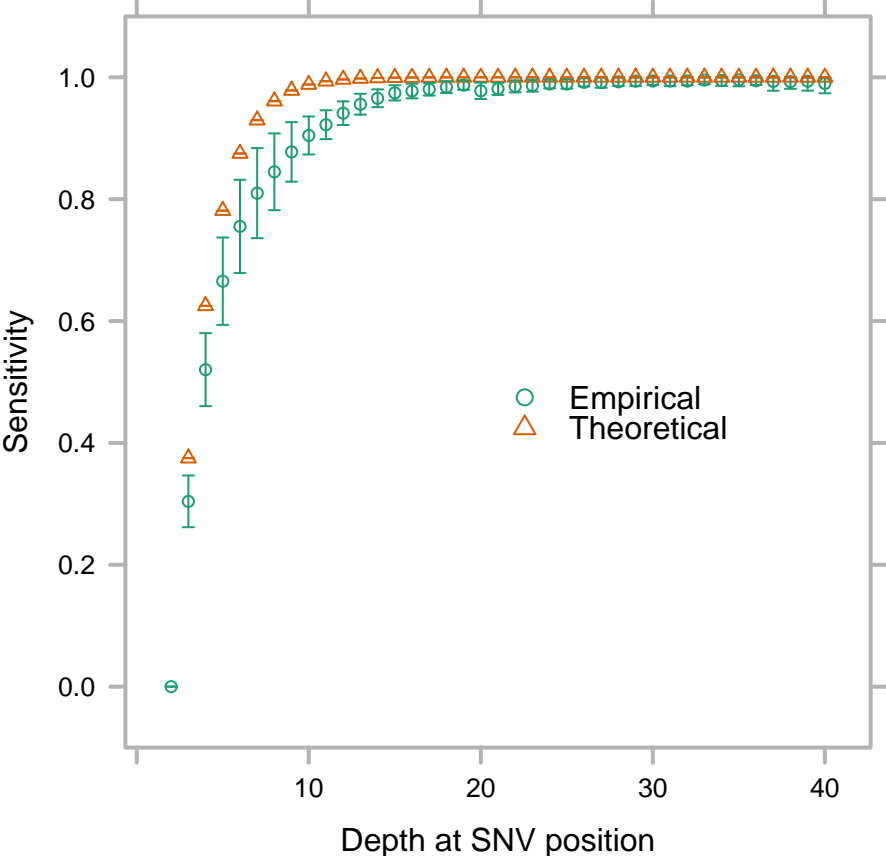

Supplementary Figure 3: SNV sensitivity against mean on-target read depth

(a) Complete CCDS target.

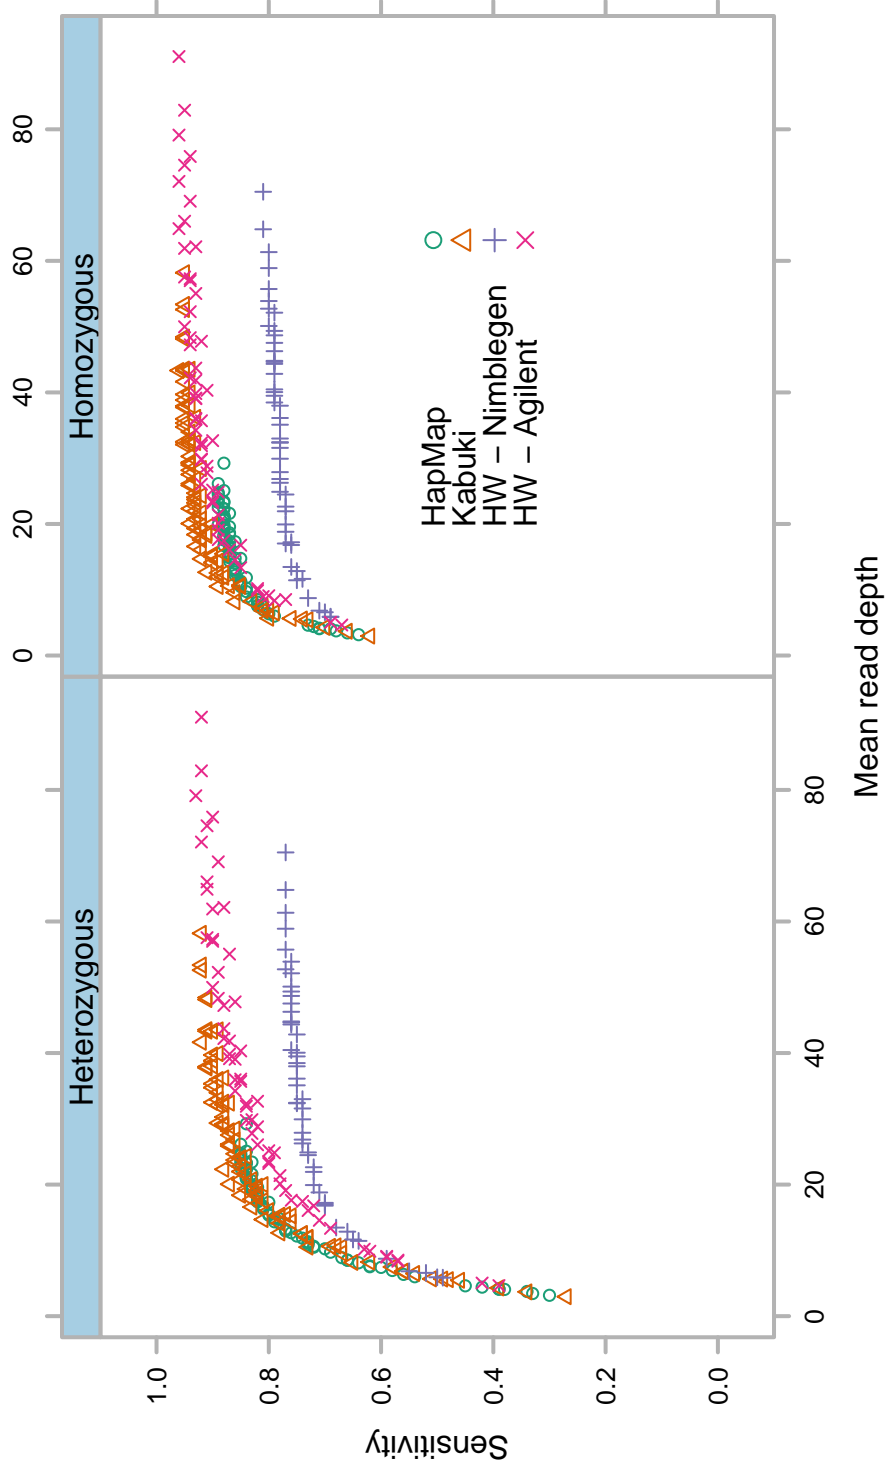

(b) Subset of CCDS targets covered by each exome capture method individually.

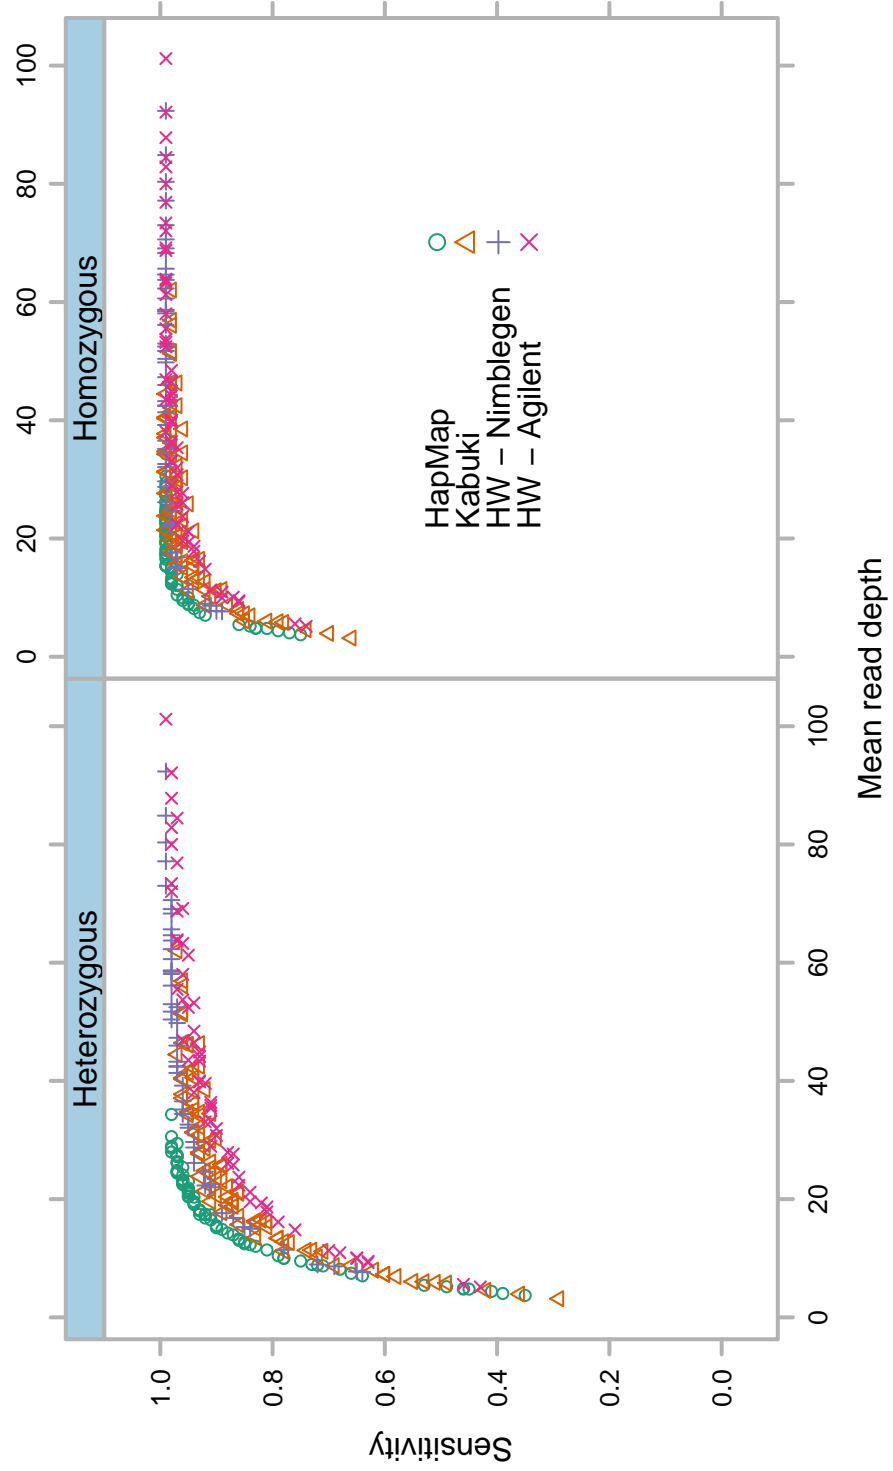

Supplementary Figure 4: Uniformity of read depth across targets from full CCDS target set. Mean read depth for non-overlapping tiles of length 100bp. All individual exomes from a given source show a similar distribution to the aggregate (data not shown). The x-axis has been truncated for display. The maximum values for the four distributions are: 142X, 3026X, 700X, and 4424X, with 0, 2085, 108, and 8941 tiles with mean depth over 400X, in order from left to right then top to bottom.

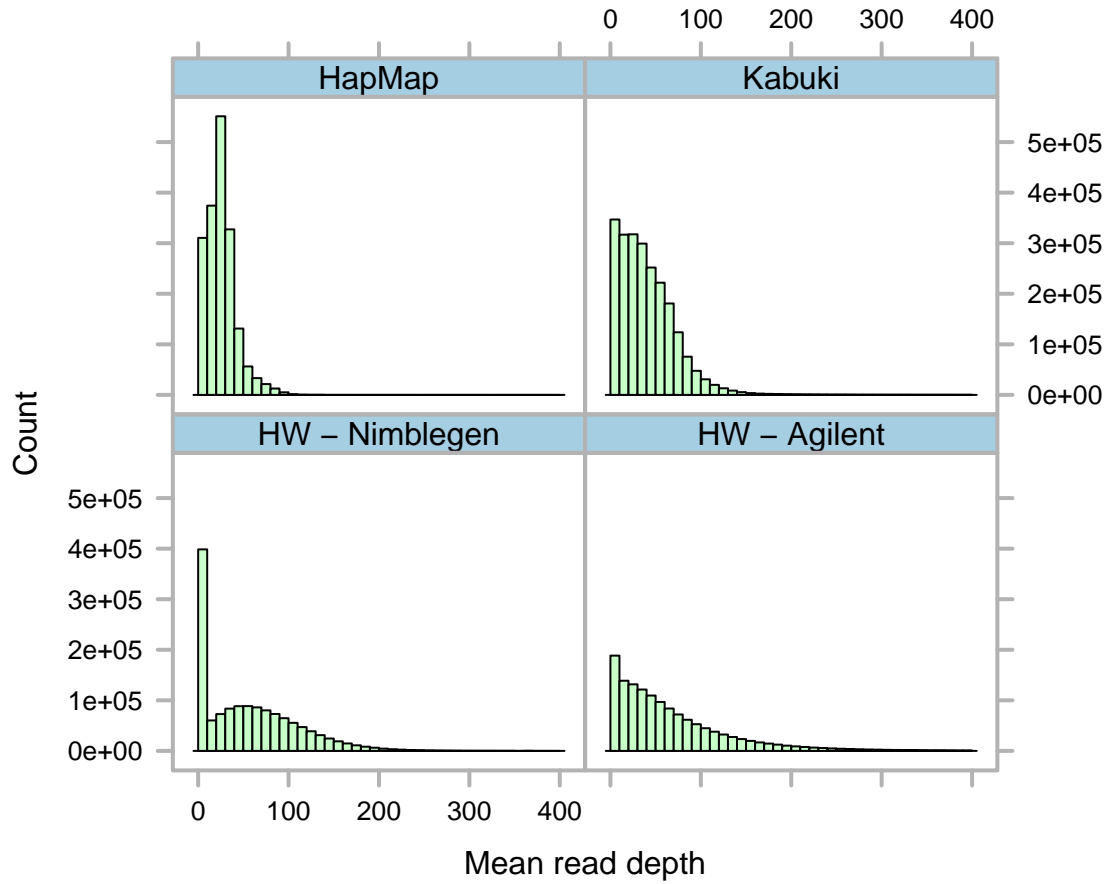

Supplementary Figure 5: Read depth in HW-Nimblegen sample for sites of novel heterozygous SNV calls from the corresponding HW-Agilent replicate.

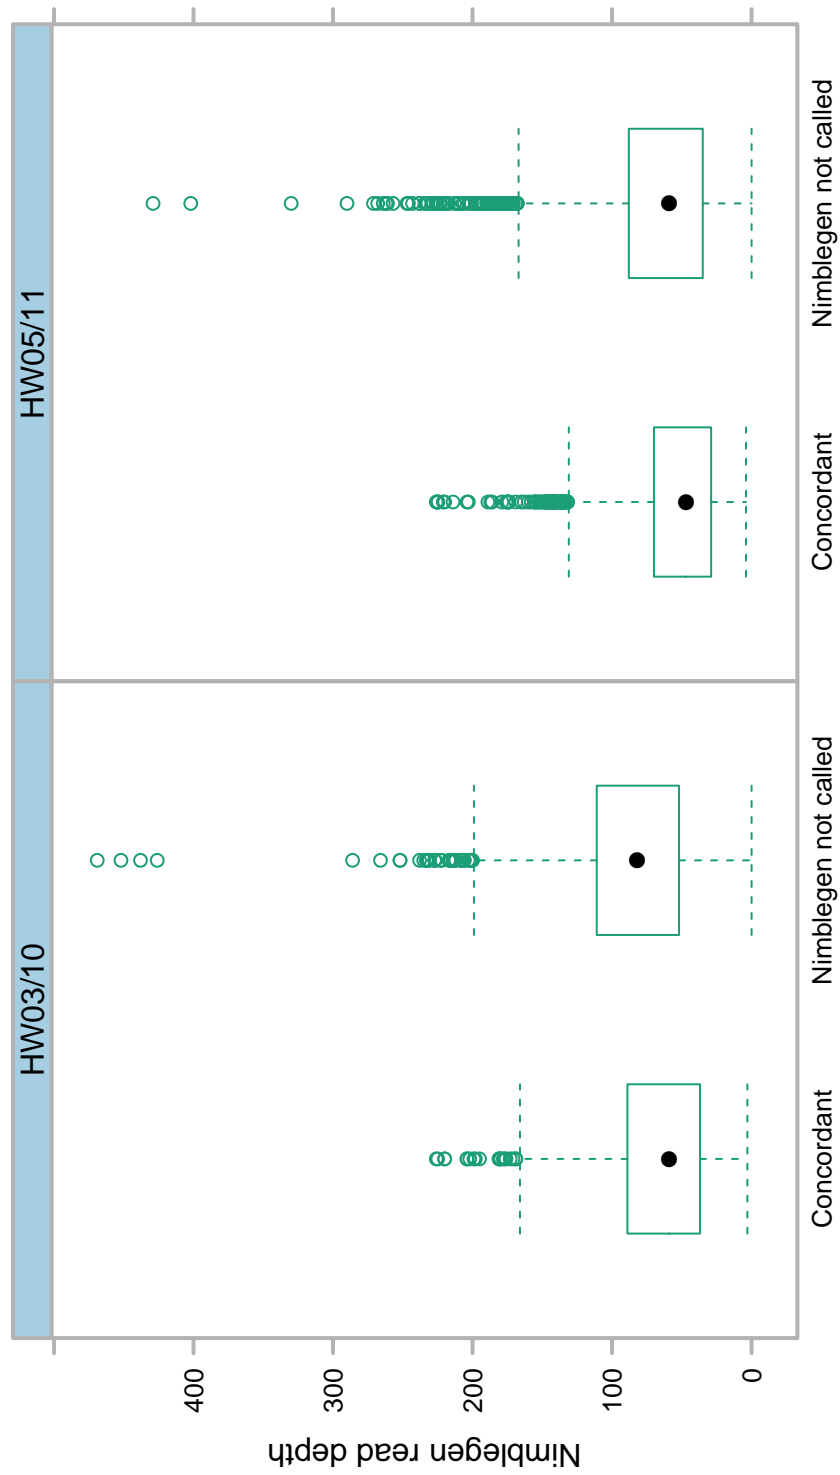

Supplementary Figure 6: G+C content distribution of 100bp target tiles classified as difficult or easy in at least one third of the exomes under study, compared with all other tiles (“Neither”). We considered a base well-covered if it had a read depth of at least 10, and a target region tile as well-covered if at least 90% of its bases were well-covered. “Difficult” target region tiles had no well-covered bases in the full alignments. “Easy” target regions were well-covered in the downsampled 0.1 alignments.

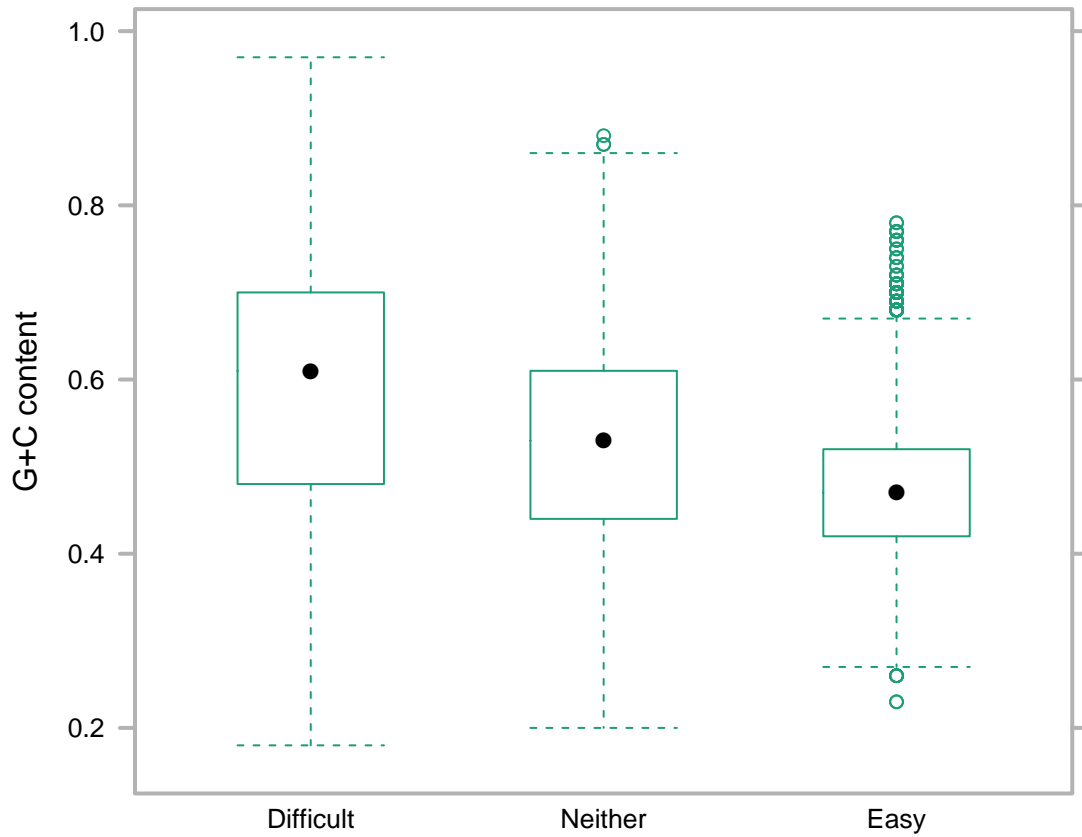

Supplementary Figure 7: Number of exomes sharing a difficult or easy target tile from full CCDS target, for non-overlapping tiles of length 100bp. The spike at 6 exomes in the difficult tiles histogram is primarily caused by tiles which were difficult only for the HW - Nimblegen set of exomes. Similarly, the spike at 14 exomes is caused by tiles which were difficult for both the HW - Nimblegen and the HapMap sets of exomes.

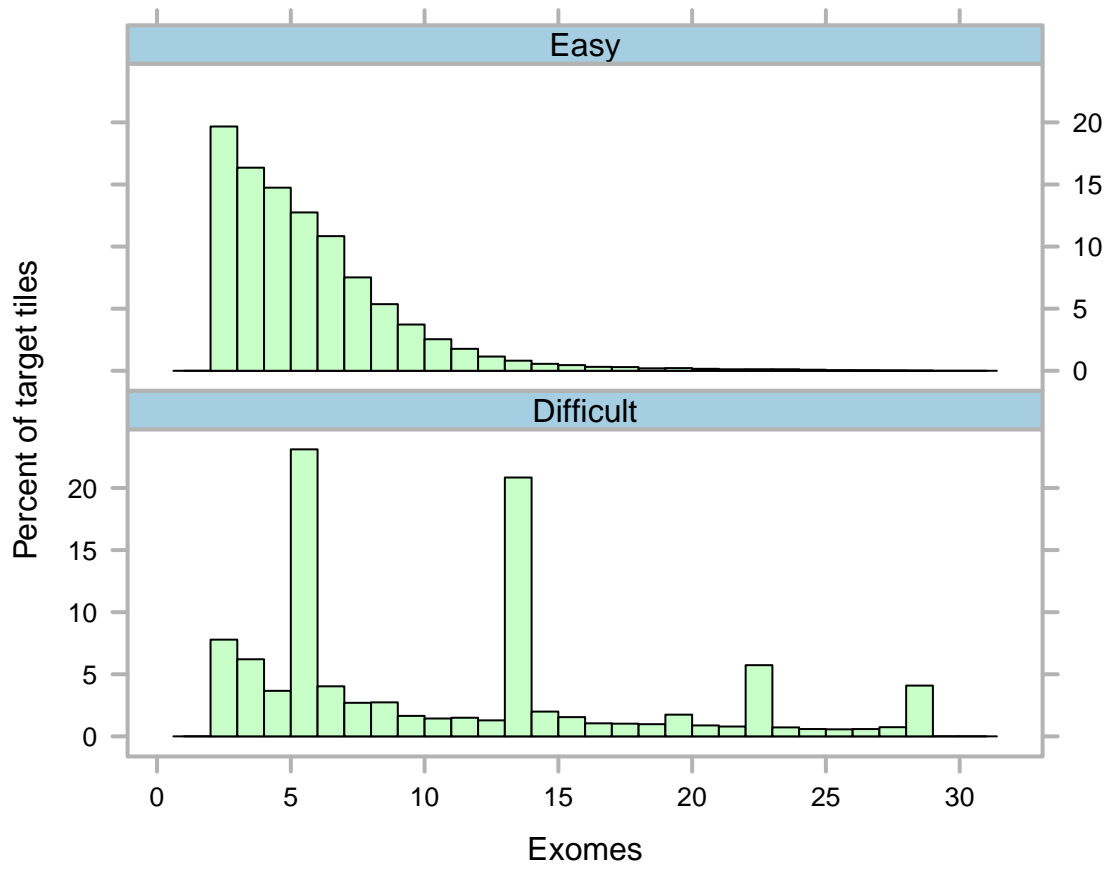



Supplementary Table 1: Sequencing and variant statistics for full alignments. The identification number in brackets for the Kabuki exomes is the kindred identification from Ng *et al.* (2010). Target is all exons from CCDS 20121025.

(a) Reads. Reads on target includes duplicate reads.

| Source | Id                  | Unpaired reads | Read pairs | Unmapped reads | Duplication | Reads on target |
|--------|---------------------|----------------|------------|----------------|-------------|-----------------|
| HapMap | SRX005923 (NA12156) | 96 794 096     | 0          | 42 376 281     | 0.38        | 28 535 286      |
|        | SRX005924 (NA12878) | 112 713 195    | 0          | 73 850 868     | 0.38        | 45 944 812      |
|        | SRX005925 (NA18507) | 102 411 337    | 0          | 64 206 533     | 0.38        | 43 565 656      |
|        | SRX005926 (NA18517) | 104 243 170    | 0          | 45 558 312     | 0.39        | 39 199 920      |
|        | SRX005927 (NA18555) | 95 868 427     | 0          | 51 540 046     | 0.39        | 36 176 546      |
|        | SRX005928 (NA18956) | 104 942 582    | 0          | 50 890 268     | 0.39        | 43 758 021      |
|        | SRX005929 (NA19129) | 105 718 468    | 0          | 53 649 298     | 0.37        | 43 595 172      |
|        | SRX005930 (NA19240) | 105 851 627    | 0          | 57 118 784     | 0.36        | 46 481 789      |
|        | SRS086451 (5)       | 55 554 344     | 0          | 8 922 948      | 0.26        | 25 337 330      |
|        | SRS086452 (10)      | 107 470 880    | 0          | 33 626 554     | 0.37        | 51 584 160      |
| Kabuki | SRS086453 (8)       | 69 910 410     | 0          | 11 271 662     | 0.40        | 32 279 661      |
|        | SRS086454 (1)       | 101 617 662    | 0          | 30 265 201     | 0.30        | 39 520 882      |
|        | SRS086455 (4)       | 28 420 086     | 21 977 080 | 52 444 732     | 0.20        | 26 979 319      |
|        | SRS086456 (2)       | 32 947 971     | 31 842 782 | 42 375 985     | 0.15        | 40 061 409      |
|        | SRS086457 (9)       | 34 649 387     | 29 112 346 | 40 984 344     | 0.16        | 35 573 753      |
|        | SRS086458 (7)       | 32 492 116     | 18 372 748 | 31 872 853     | 0.19        | 26 843 835      |
|        | SRS086459 (6)       | 33 076 820     | 25 383 251 | 41 771 754     | 0.16        | 35 567 936      |
|        | SRS086460 (3)       | 34 647 576     | 34 367 697 | 45 463 717     | 0.21        | 47 173 550      |
|        | HW01                | 1 308 139      | 49 904 469 | 2 032 001      | 0.14        | 48 041 526      |
|        | HW02                | 1 897 449      | 84 216 154 | 3 155 080      | 0.23        | 75 217 183      |
|        | HW03                | 2 187 668      | 73 413 924 | 3 538 901      | 0.12        | 62 695 130      |
|        | HW04                | 2 515 907      | 72 956 766 | 4 123 779      | 0.21        | 61 690 997      |
| HW05   | 1 244 015           | 49 439 950     | 1 969 695  | 0.19           | 47 732 543  |                 |
| HW06   | 2 272 384           | 85 484 712     | 3 967 312  | 0.43           | 73 853 952  |                 |
| HW07   | 1 805 307           | 53 068 827     | 2 225 554  | 0.15           | 49 867 900  |                 |
| HW08   | 2 469 392           | 103 671 713    | 5 997 767  | 0.13           | 72 015 099  |                 |
| HW09   | 2 218 302           | 88 423 465     | 4 469 173  | 0.13           | 70 108 401  |                 |
| HW10   | 1 820 150           | 50 762 270     | 2 295 696  | 0.18           | 45 910 895  |                 |
| HW11   | 1 952 722           | 93 109 004     | 2 537 229  | 0.29           | 82 536 576  |                 |
| HW12   | 2 127 991           | 98 186 380     | 5 017 474  | 0.12           | 82 127 392  |                 |

(b) Coverage.

| Source         | Id                  | Bases on target | Mean on-target read depth (X) | Granular 3rd quartile | Granular median | Granular 1st quartile | Bases over 15X |
|----------------|---------------------|-----------------|-------------------------------|-----------------------|-----------------|-----------------------|----------------|
| HapMap         | SRX005923 (NA12156) | 748 129 484     | 23.3                          | 33                    | 23              | 14                    | 70.9           |
|                | SRX005924 (NA12878) | 938 442 775     | 29.2                          | 43                    | 31              | 17                    | 77.2           |
|                | SRX005925 (NA18507) | 785 157 626     | 24.5                          | 34                    | 24              | 15                    | 74.5           |
|                | SRX005926 (NA18517) | 747 479 318     | 23.3                          | 32                    | 22              | 14                    | 71.5           |
|                | SRX005927 (NA18555) | 674 142 296     | 21.0                          | 29                    | 21              | 13                    | 67.9           |
|                | SRX005928 (NA18956) | 745 827 941     | 23.2                          | 32                    | 22              | 14                    | 71.5           |
| Kabuki         | SRX005929 (NA19129) | 794 884 872     | 24.8                          | 34                    | 24              | 16                    | 75.2           |
|                | SRX005930 (NA19240) | 838 847 299     | 26.1                          | 36                    | 26              | 16                    | 76.5           |
|                | SRS086451 (5)       | 716 863 810     | 22.3                          | 32                    | 22              | 12                    | 66.7           |
|                | SRS086452 (10)      | 1 336 500 389   | 41.6                          | 62                    | 42              | 21                    | 82.2           |
|                | SRS086453 (8)       | 745 626 895     | 23.2                          | 34                    | 22              | 11                    | 64.7           |
|                | SRS086454 (1)       | 1 211 593 918   | 37.7                          | 55                    | 37              | 19                    | 79.4           |
| HW - Nimblegen | SRS086455 (4)       | 1 064 500 162   | 33.2                          | 48                    | 17              | 7                     | 52.4           |
|                | SRS086456 (2)       | 1 688 303 250   | 52.6                          | 73                    | 48              | 26                    | 85.5           |
|                | SRS086457 (9)       | 1 396 928 739   | 43.5                          | 62                    | 40              | 20                    | 80.3           |
|                | SRS086458 (7)       | 1 057 429 708   | 32.9                          | 47                    | 31              | 16                    | 76.1           |
|                | SRS086459 (6)       | 1 390 924 591   | 43.3                          | 62                    | 37              | 19                    | 79.8           |
|                | SRS086460 (3)       | 1 868 207 905   | 58.2                          | 80                    | 52              | 28                    | 86.2           |
| HW - Agilent   | HW01                | 1 673 052 868   | 52.1                          | 82                    | 47              | 10                    | 72.4           |
|                | HW02                | 2 263 108 604   | 70.5                          | 111                   | 64              | 15                    | 74.7           |
|                | HW03                | 1 968 695 632   | 61.3                          | 99                    | 58              | 13                    | 73.7           |
|                | HW04                | 1 729 762 191   | 53.9                          | 85                    | 49              | 11                    | 72.6           |
|                | HW05                | 1 562 492 306   | 48.7                          | 75                    | 43              | 10                    | 72             |
|                | HW06                | 1 651 050 568   | 51.4                          | 93                    | 16              | 2                     | 50.1           |
| HW - Nimblegen | HW07                | 1 402 799 214   | 43.7                          | 61                    | 32              | 14                    | 73.2           |
|                | HW08                | 2 539 615 761   | 79.1                          | 104                   | 57              | 27                    | 85.6           |
|                | HW09                | 2 435 454 947   | 75.9                          | 104                   | 56              | 23                    | 81.2           |
|                | HW10                | 1 253 477 679   | 39.1                          | 55                    | 29              | 12                    | 69.5           |
|                | HW11                | 1 986 899 670   | 61.9                          | 86                    | 45              | 19                    | 79.5           |
|                | HW12                | 2 922 944 682   | 91.1                          | 122                   | 68              | 32                    | 86.3           |

(c) Variants in target regions.

| Source | Id                  | Indels | HapMap3      |            |        | SNVs         |            |        | Total |
|--------|---------------------|--------|--------------|------------|--------|--------------|------------|--------|-------|
|        |                     |        | Heterozygous | Homozygous | Total  | Heterozygous | Homozygous | Total  |       |
| HapMap | SRX005923 (NA12156) | 104    | 6 663        | 5 202      | 11 865 | 3 990        | 1 611      | 5 601  |       |
|        | SRX005924 (NA12878) | 95     | 6 618        | 5 195      | 11 813 | 3 657        | 1 555      | 5 212  |       |
|        | SRX005925 (NA18507) | 119    | 6 843        | 5 516      | 12 359 | 6 187        | 1 838      | 8 025  |       |
|        | SRX005926 (NA18517) | 110    | 6 876        | 5 495      | 12 371 | 6 284        | 1 775      | 8 059  |       |
|        | SRX005927 (NA18555) | 99     | 5 949        | 5 823      | 11 772 | 3 395        | 1 675      | 5 070  |       |
|        | SRX005928 (NA18956) | 90     | 5 961        | 5 737      | 11 698 | 3 331        | 1 651      | 4 982  |       |
|        | SRX005929 (NA19129) | 132    | 6 796        | 5 732      | 12 528 | 6 291        | 1 825      | 8 116  |       |
|        | SRX005930 (NA19240) | 104    | 6 945        | 5 553      | 12 498 | 6 308        | 1 829      | 8 137  |       |
|        | SRS086451 (5)       | 94     | 7 040        | 5 598      | 12 638 | 4 319        | 1 497      | 5 816  |       |
|        | SRS086452 (10)      | 128    | 7 328        | 5 691      | 13 019 | 4 993        | 1 740      | 6 733  |       |
| Kabuki | SRS086453 (8)       | 103    | 6 866        | 5 714      | 12 580 | 4 500        | 1 631      | 6 131  |       |
|        | SRS086454 (1)       | 135    | 7 526        | 5 627      | 13 153 | 5 082        | 1 768      | 6 850  |       |
|        | SRS086455 (4)       | 154    | 6 091        | 5 216      | 11 307 | 9 100        | 2 262      | 11 362 |       |
|        | SRS086456 (2)       | 159    | 7 303        | 5 693      | 12 996 | 5 220        | 1 934      | 7 154  |       |
|        | SRS086457 (9)       | 156    | 7 316        | 5 516      | 12 832 | 5 366        | 1 875      | 7 241  |       |
|        | SRS086458 (7)       | 156    | 7 116        | 5 868      | 12 984 | 5 025        | 1 981      | 7 006  |       |
|        | SRS086459 (6)       | 165    | 8 365        | 5 316      | 13 681 | 6 601        | 1 747      | 8 348  |       |
|        | SRS086460 (3)       | 172    | 7 262        | 5 642      | 12 904 | 5 260        | 1 939      | 7 199  |       |
|        | HW01                | 135    | 6 169        | 4 838      | 11 007 | 4 250        | 1 518      | 5 768  |       |
|        | HW02                | 155    | 5 951        | 4 994      | 10 945 | 4 448        | 1 704      | 6 152  |       |
|        | HW03                | 140    | 5 843        | 4 902      | 10 745 | 3 627        | 1 697      | 5 324  |       |
|        | HW04                | 118    | 6 309        | 4 678      | 10 987 | 3 879        | 1 556      | 5 435  |       |
| HW05   | 135                 | 6 400  | 4 789        | 11 189     | 4 396  | 1 679        | 6 075      |        |       |
| HW06   | 102                 | 4 488  | 4 284        | 8 772      | 3 024  | 1 441        | 4 465      |        |       |
| HW07   | 271                 | 7 276  | 5 512        | 12 788     | 12 798 | 2 185        | 14 983     |        |       |
| HW08   | 226                 | 7 551  | 5 756        | 13 307     | 5 331  | 1 927        | 7 258      |        |       |
| HW09   | 189                 | 7 667  | 5 680        | 13 347     | 5 611  | 1 847        | 7 458      |        |       |
| HW10   | 235                 | 6 598  | 5 781        | 12 379     | 12 597 | 2 107        | 14 704     |        |       |
| HW11   | 212                 | 7 546  | 5 738        | 13 284     | 10 582 | 1 994        | 12 576     |        |       |
| HW12   | 184                 | 7 899  | 5 751        | 13 650     | 6 434  | 2 041        | 8 475      |        |       |

Supplementary Table 2: Mean sensitivity at varying levels of read depth at a polymorphic site. Data shown in Figure 2. A complete table up to depth 100 is available in the file recall.tsv.

| Depth | Heterozygous | Homozygous |
|-------|--------------|------------|
| 0     | 0.00         | 0.00       |
| 1     | 0.00         | 0.06       |
| 2     | 0.00         | 0.89       |
| 3     | 0.30         | 0.97       |
| 4     | 0.52         | 0.99       |
| 5     | 0.67         | 0.99       |
| 6     | 0.76         | 0.99       |
| 7     | 0.81         | 0.99       |
| 8     | 0.84         | 0.99       |
| 9     | 0.88         | 0.99       |
| 10    | 0.90         | 0.99       |
| 11    | 0.92         | 0.99       |
| 12    | 0.94         | 0.99       |
| 13    | 0.96         | 0.99       |
| 14    | 0.97         | 0.99       |
| 15    | 0.97         | 0.99       |
| 16    | 0.98         | 0.99       |
| 17    | 0.98         | 0.99       |
| 18    | 0.98         | 0.99       |
| 19    | 0.99         | 1.00       |
| 20    | 0.98         | 1.00       |
| 25    | 0.99         | 1.00       |
| 30    | 0.99         | 1.00       |
| 35    | 1.00         | 1.00       |
| 40    | 0.99         | 1.00       |

Supplementary Table 3: Data sources and sample information.

| Source         | Samples | Reads              | Capture                           | Sequencing   |
|----------------|---------|--------------------|-----------------------------------|--------------|
| HapMap         | 8       | single 76bp        | 2 custom Agilent 244K microarrays | Illumina GAI |
| Kabuki         | 10      | single/paired 76bp | custom Agilent 1M aCGH array      | Illumina GAI |
| HW - Nimblegen | 6       | paired 54bp        | Roche NimbleGen 2.1M              | Illumina GAI |
| HW - Agilent   | 6       | paired 54bp        | Agilent SureSelect All Exon 38M   | Illumina GAI |

- Chang, H., Jackson, D. G., Kayne, P. S., Ross-Macdonald, P. B., Ryseck, R. P., and Siemers, N. O. (2011). Exome sequencing reveals comprehensive genomic alterations across eight cancer cell lines. *PLoS One*, **6**(6).
- McKenna, A., Hanna, M., Banks, E., Sivachenko, A., Cibulskis, K., Kernytsky, A., Garimella, K., Altshuler, D., Gabriel, S., Daly, M., and DePristo, M. A. (2010). The genome analysis toolkit: a mapreduce framework for analyzing next-generation dna sequencing data. *Genome Res.* **20**(9), 1297–1303.
- Ng, S. B., Bigham, A. W., Buckingham, K. J., Hannibal, M. C., McMillin, M. J., Gildersleeve, H. I., Beck, A. E., Tabor, H. K., Cooper, G. M., Mefford, H. C., Lee, C., Turner, E. H., Smith, J. D., Rieder, M. J., Yoshiura, K., Matsumoto, N., Ohta, T., Niikawa, N., Nickerson, D. A., Bamshad, M. J., and Shendure, J. (2010). Exome sequencing identifies MLL2 mutations as a cause of Kabuki syndrome. *Nat Genet.* **42**(9), 790–793.
